# Supplementary material
Source: Research Square preprint supplement (doi:10.21203/rs.3.rs-9616060/v1)
Supplement: Supplementary file 1 [file ce3b3f68cb2182043f4f9268.docx]

**Supplementary Information**

**Biomimetic tendon-inspired organogels with high strength and toughness via in-situ alignment-locked densification strategy**

Zhentao Zhang1, Min Sang1*, Shuai Liu1, Yucheng Pan1, Zimu Li1, Shilong Duan1, Xinglong Gong1, 2*

1*Department of Modern Mechanics, University of Science and Technology of China (USTC), Hefei, Anhui 230027, PR China*

2*State Key Laboratory of Fire Science, University of Science and Technology of China (USTC), Hefei, Anhui 230026, PR China.*

Corresponding author: Tel: 86-551-63600419; Fax: 86-551-63600419.

E-mail: gongxl@ustc.edu.cn (X. L. Gong)

sm019050@mail.ustc.edu.cn (M. Sang)

**The file includes**

Supplementary Figs. 1 to 12

Supplementary Table 1


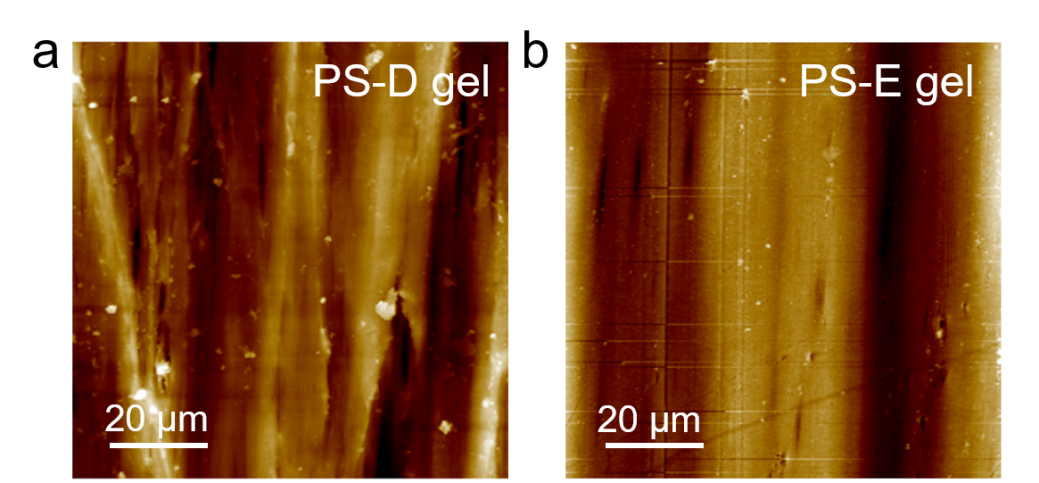


**Supplementary Fig. 1 | AFM images of the PS-D gel (a) and PS-E gel (b).**


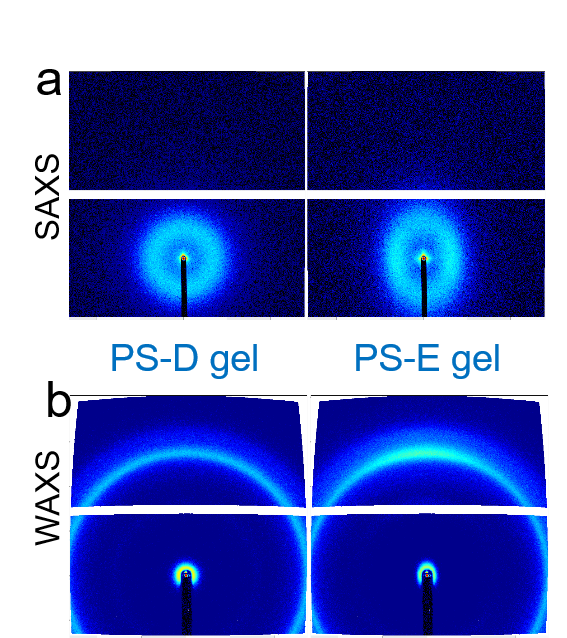


**Supplementary Fig. 2 | 2D SAXS patterns of the PS-D gel (a) and PS-E gel (b).**


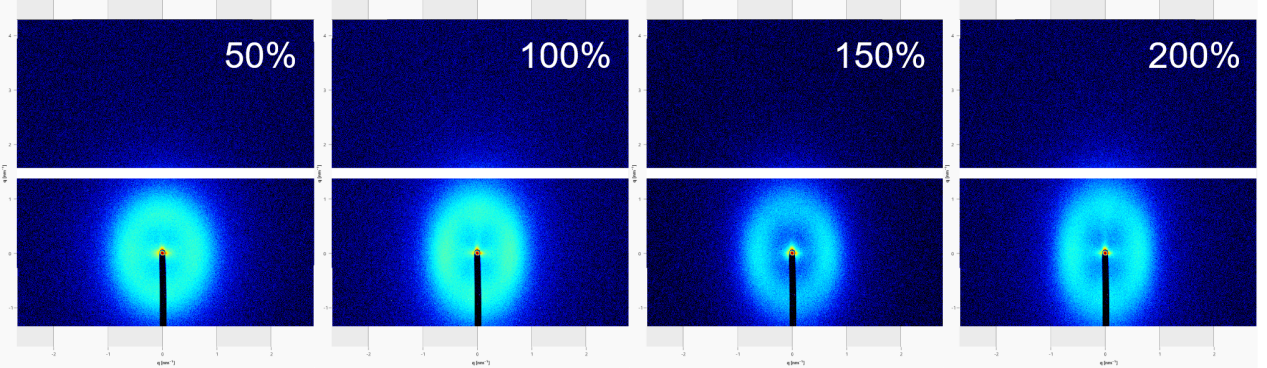


**Supplementary Fig. 3 | 2D SAXS patterns of PS-DE gels at different pre****-stretching levels.** 2D SAXS patterns of PS-DE gels with pre-stretching levels of 50%, 100%, 150%, and 200%,


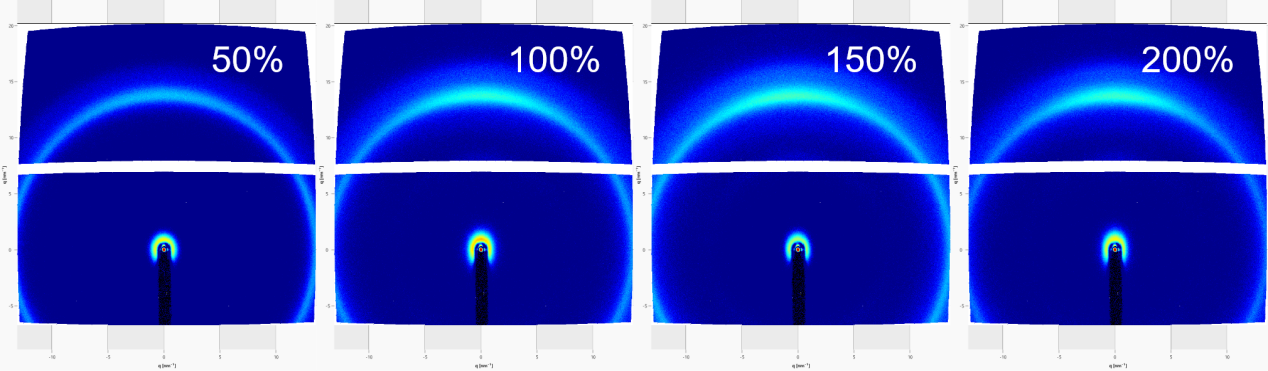


**Supplementary Fig. 4 | 2D WAXS patterns of PS-DE gels at different pre-stretching levels.** 2D WAXS patterns of PS-DE gels with pre-stretching levels of 50%, 100%, 150%, and 200%, revealing the evolution of crystalline orientation with increasing pre-stretching.


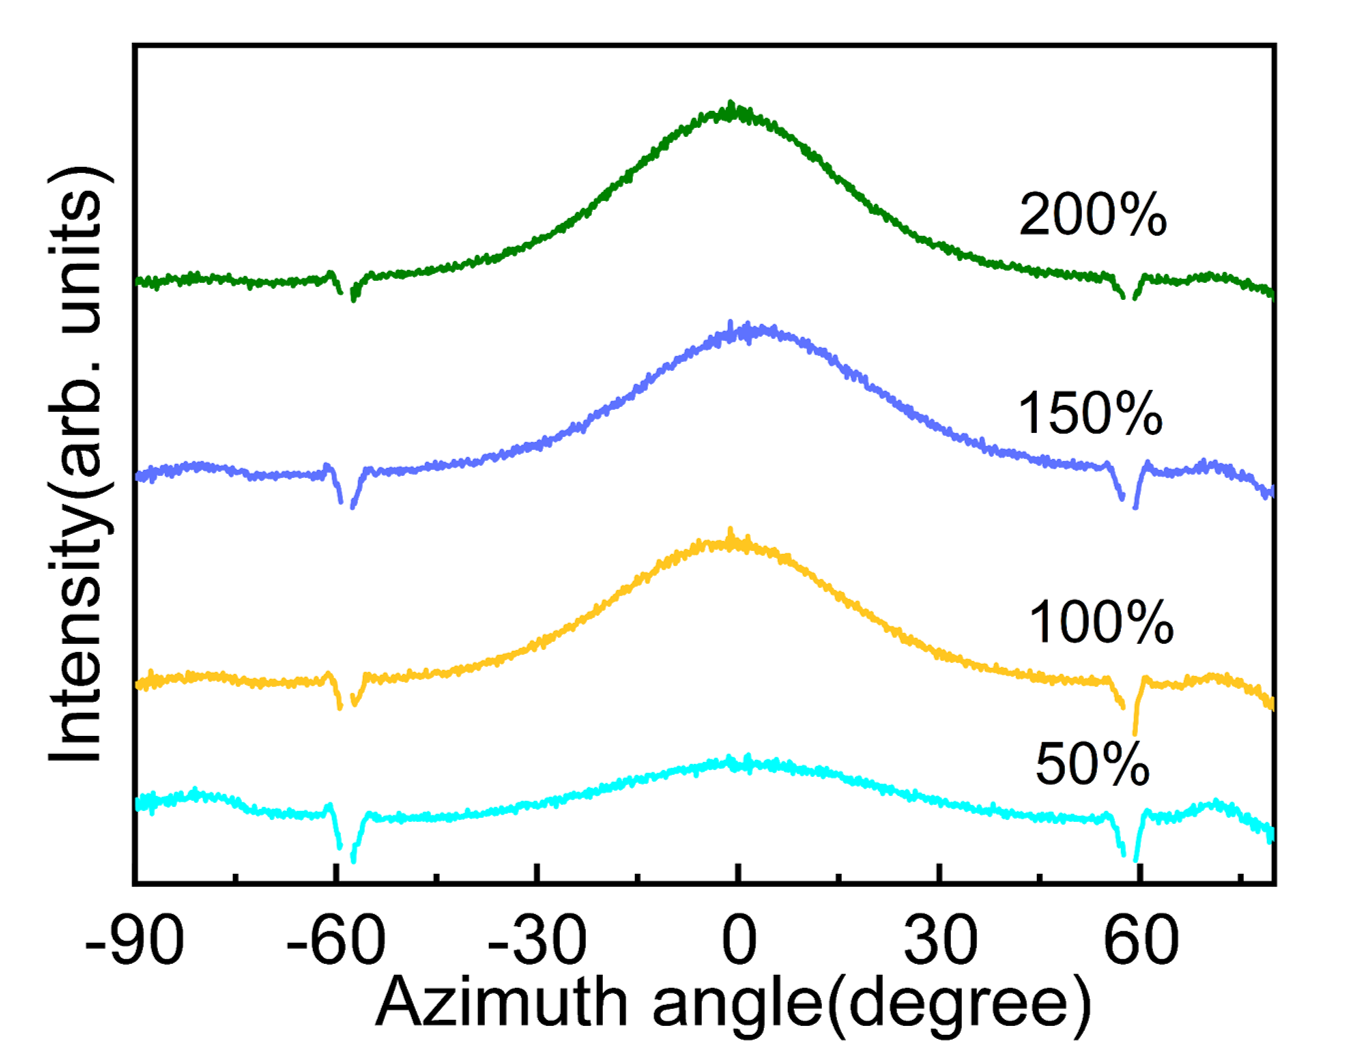


**Supplementary Fig. 5** **|** **Azimuthal intensity distributions of PS-DE gels at different pre-stretching levels.** Azimuthal intensity distributions of PS-DE gels with pre-stretching levels of 50%, 100%, 150%, and 200%.


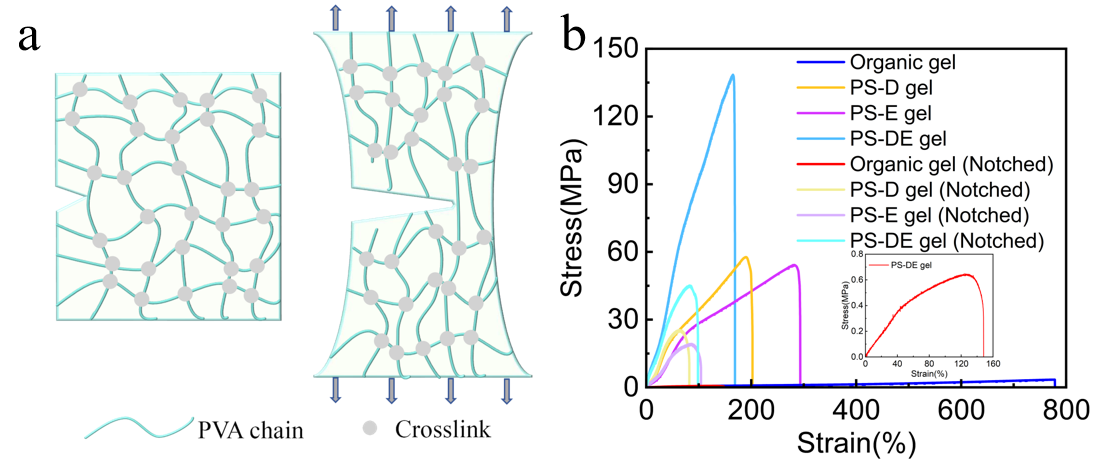


**Supplementary Fig. 6 | Fracture toughness of the organic gel.** **a**, Schematic illustration of the energy dissipation mechanism at the crack tip. **b**, Tensile stress-strain curves of notched and unnotched samples.


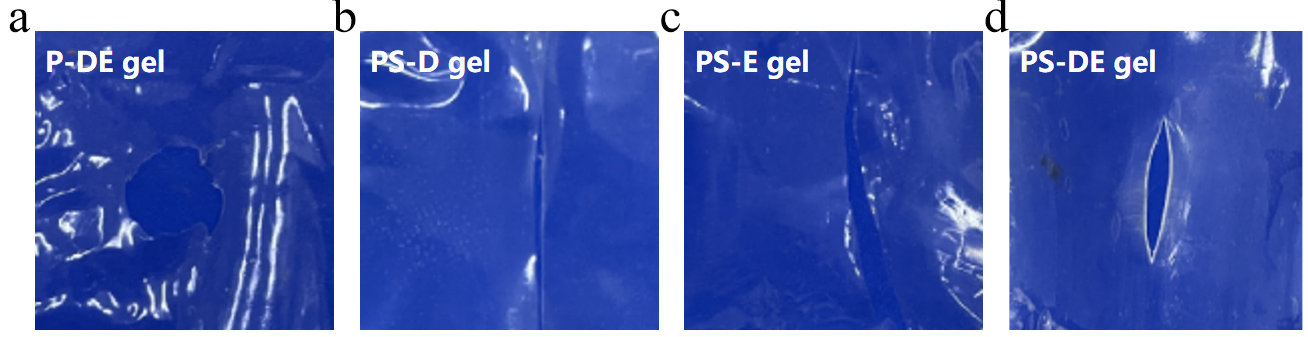


**Supplementary Fig. 7. |** **Post-impact** **morphologies of the gels.** Physical morphologies of P-DE (a), PS-D (b), PS-E (c), and PS-DE (d) gels after ballistic penetration.


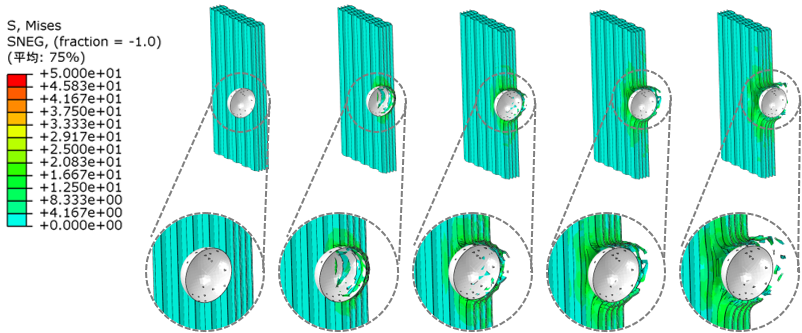


**Supplementary Fig. 8** | **FEA simulation of ballistic impact.** The internal stress distribution of the PS-D gel during projectile penetration.


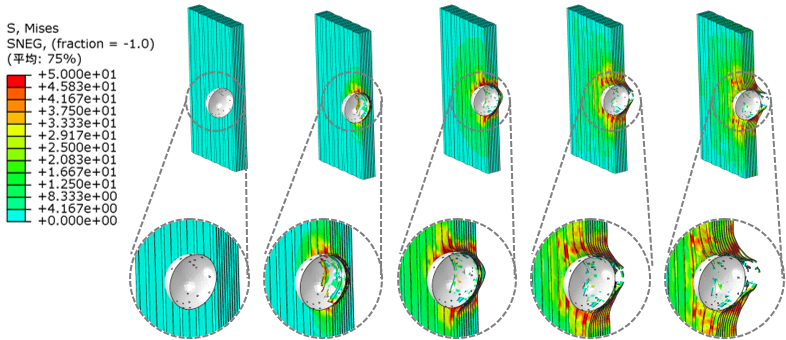


**Supplementary Fig. 9** | **FEA simulation of ballistic impact.** The internal stress distribution of the PS-E gel during projectile penetration.


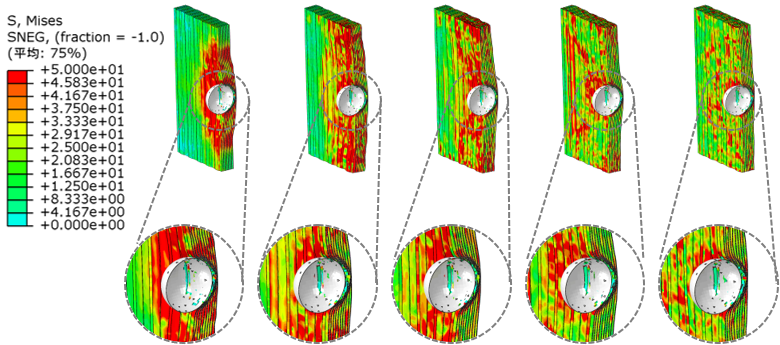


**Supplementary Fig. 10** | **FEA simulation of** **ballistic impact.** Internal stress distribution of the PS-DE gel during theprojectile rebound phase.

**
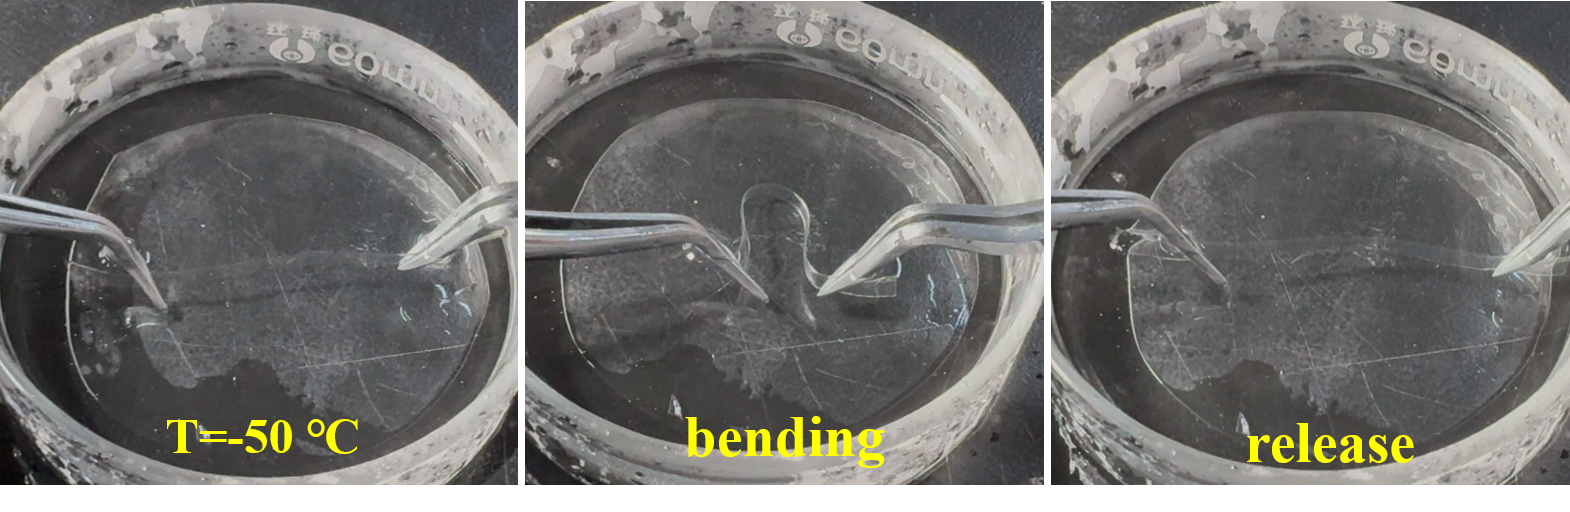
**

**Supplementary Fig. 11 | Low-temperature flexibility of the PS-DE gel.** Photographs demonstrating the bending and release process at -50 °C.


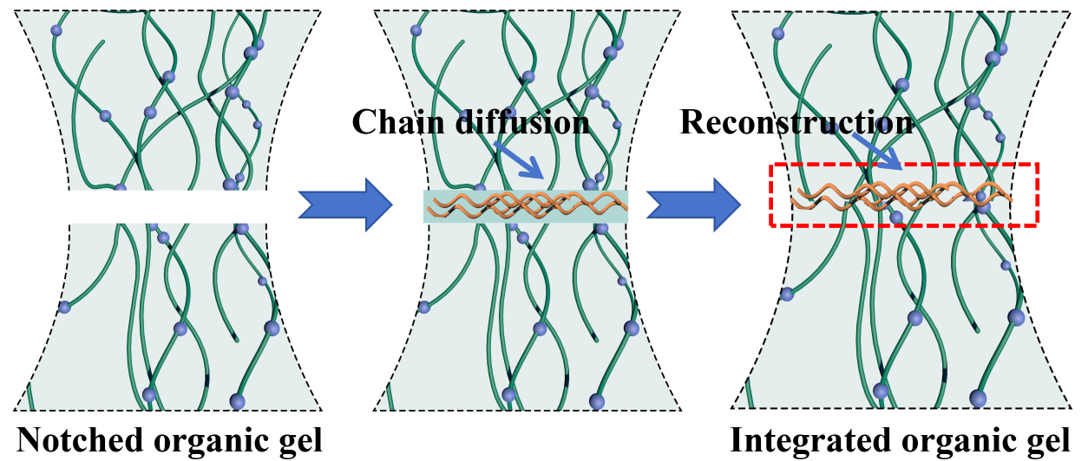


**Supplementary Fig. 12. | Schematic of the repairability mechanism.**

**Supplementary Table 1.** Comparison of the toughness, tensile strength, and modulus of PS-DE gel with other reported gels.

| Material | Toughness (MJ/m3) | Strength (MPa) | Ref | Journal name |
| --- | --- | --- | --- | --- |
| P-gel | 125.6 | 129.3 | This work | \ |
| FC-EtFe | 58.9 | 8.5 | [1] | Science Advances |
| highly entangled hydrogel | 19.8 | 10.2 | [2] | Science |
| SR-0.38 | 0.6 | 0.4 | [3] | Science |
| CR-4 | 22.0 | 5.5 | [4] | Nature Materials |
| p-Pep/Cu2+ | 87.7 | 1.1 | [5] | Nature Communications |
| AFH | 37 | 7 | [6] | Nature Communications |
| CSNF-TA-PVA | 122.4 | 60.2 | [7] | Nature Communications |
| AV20SH-120 | 106 | 61 | [8] | Nature Communications |
| PVA-NC | 135 | 61 | [9] | Nature Communications |
| RHOCF | 76.85 | 7.93 | [10] | Nature Communications |
| SM-PVA | 120.98 | 25.79 | [11] | Nature Communications |
| sBIN | 8.9 | 15.3 | [12] | Nature Materials |

**Supplementary Reference:**

1. Guo, X., Dong, X., Zou, G., Gao, H. & Zhai, W. Strong and tough fibrous hydrogels reinforced by multiscale hierarchical structures with multimechanisms. *Sci. Adv.* **9**, 7075 (2023).

2. Kim, J., Zhang, G., Shi, M. & Suo, Z. Fracture, fatigue, and friction of polymers in which entanglements greatly outnumber cross-links. *Science* **374**, 212-216 (2021).

3. Liu, C. *et al.* Tough hydrogels with rapid self-reinforcement. *Science* **372**, 1078-1081 (2021).

4. Li, W. *et al.* Nanoconfined polymerization limits crack propagation in hysteresis-free gels. *Nat. Mater.* **23**, 131-138 (2024).

5. Xue, B. *et al.* Strong, tough, rapd-recovery, and fatigue-resistant hydrogels made of picot peptide fibres. *Nat. Commun.* **14**, 2583 (2023).

6. Wu, S. et al. Spider-silk-inspired strong and tough hydrogel fibers with anti-freezing and water retention properties. *Nat. Commun.* **15**, 4441 (2024).

7. Zhuo, H. et al. Bamboo-inspired ultra-strong nanofiber-reinforced composite hydrogels. *Nat. Commun.* **16**, 980 (2025).

8. Li, H. et al. Hierarchical crack-resistant, tissue-mimetic hydrogels enabled by progressive nanocrystallization of anisotropic polymer networks. *Nat. Commun.* **16**, 10890 (2025).

9. Shi, D., Ji, D. & Bae, J. Hierarchically structuralized hydrogels with ligament-like mechanical performance. *Nat. Commun.* **16**, 11492 (2025).

10. Guo, X. et al. Robust zwitterionic hydrogels enabled by consolidated supramolecular networks and spatially hierarchical structures. Nat. Commun. **16**, 9454 (2025).

11. Yang, D. et al. Tough and tear resistant hydrogel with a sandwich mineralized structure induced by bidirectional ion migration. *Nat. Commun.* **16**, 11328 (2025).

12. Bao, B. et al. Rapid fabrication of physically robust hydrogels. *Nat. Mater.* **22**, 1253–1260 (2023).
